# Supplementary material
Source: Springer Nature journal article supplement (https://www.springermedizin.de/resource/supplementary/12889_2012_5030_MOESM1_ESM.pdf/9490702)

Reason for not using a condom

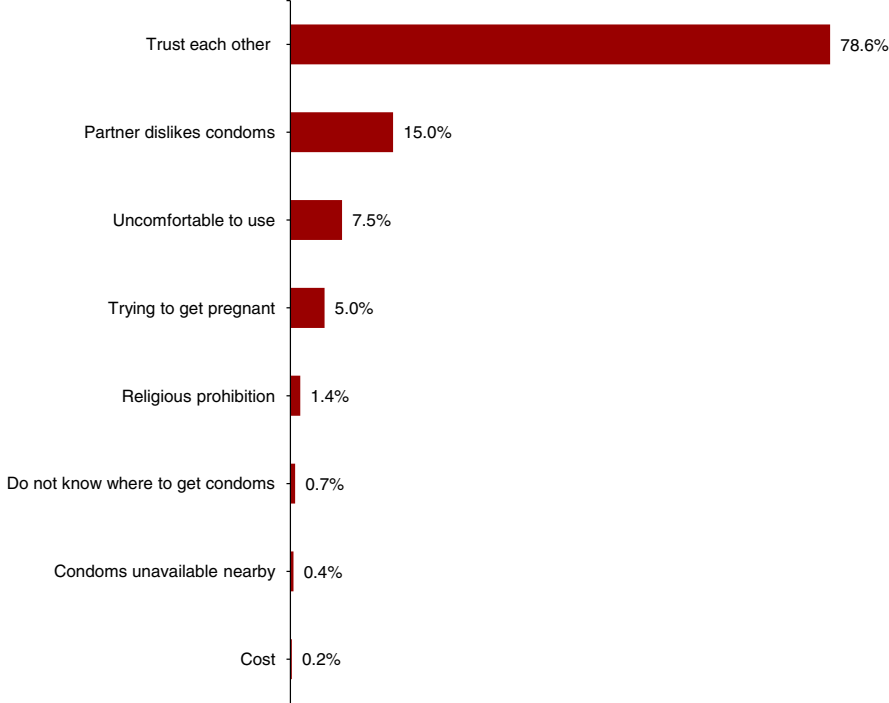

Supplement: MOESM1 [file 9490702]
